# Supplementary material
Source: PubMed Central journal article supplement (PMC3831023)
Supplement: NIHMS262487-supplement-1_si_001.pdf [file NIHMS262487-supplement-1_si_001.pdf]

Supplementary Table 1: The list of 38 lectins used in the microarray.

| Lectin   | Full Name                             | Source     | Cat No  |
|----------|---------------------------------------|------------|---------|
| GNA      | <i>Galanthus nivalis</i>              | Vector Lab | L-1240  |
| GSL-I B4 | <i>Griffonia simplicifolia</i> -TB4   | Vector Lab | L-1104  |
| PTL-I    | <i>Psophocarpus tetragonolobus</i>    | Vector Lab | L-1360  |
| BSL-II   | <i>Bandeiraea simplicifolia</i> II    | Vector Lab | L-1210  |
| VVA      | <i>Vicia villosa</i>                  | Vector Lab | L-1230  |
| ECA      | <i>Erythrina cristagalli</i>          | Vector Lab | L-1140  |
| HHL      | <i>Hippeastrum</i> Hybrid             | Vector Lab | L-1380  |
| BPL      | <i>Bauhinia purpurea</i>              | Vector Lab | L-1280  |
| AAL      | <i>Aleuria aurantia</i>               | Vector Lab | L-1390  |
| ConA     | <i>Canavalia ensiformis</i>           | Vector Lab | LK-2000 |
| DBA      | <i>Dolichos biflorus</i>              | Vector Lab |         |
| PNA      | <i>Arachis hypogaea</i>               | Vector Lab |         |
| SBA      | <i>Glycine max</i>                    | Vector Lab |         |
| UEA      | <i>Ulex europaeus</i>                 | Vector Lab |         |
| WGA      | <i>Triticum aestivum</i>              | Vector Lab |         |
| RCA120   | <i>Ricinus communis</i>               | Vector Lab |         |
| BSL-I    | <i>Bandeiraea simplicifolia</i> I     | Vector Lab |         |
| PEA      | <i>Pisum sativum</i>                  | Vector Lab | LK-3000 |
| PHA-E    | <i>Phaseolus vulgaris</i> E           | Vector Lab |         |
| PHA-L    | <i>Phaseolus vulgaris</i> L           | Vector Lab |         |
| SJA      | <i>Sophora japonica</i>               | Vector Lab |         |
| S-WGA    | Succinylated <i>Triticum aestivum</i> | Vector Lab |         |
| SNA I    | <i>Sambucus nigra</i>                 | EY lab     | L-6802  |
| Jacalin  | <i>Artocarpus integrifolia</i>        | EY lab     | L-6301  |
| Calsepa  | <i>Calystegia sepium</i>              | EY lab     | L-8011  |
| LcHA     | <i>Lens culinaris</i>                 | EY lab     | L-1402  |
| MPA      | <i>Maclura pomifera</i>               | EY lab     | L-3901  |
| MNA-G    | <i>Morus nigra</i> G                  | EY lab     | L-9005  |
| NPA      | <i>Narcissus pseudonarcissus</i>      | EY lab     | L-8006  |
| STA      | <i>Solanum tuberosum</i>              | EY lab     | L-4701  |
| MAA      | <i>Maackia amurensis</i>              | EY lab     | L-7801  |
| DSA      | <i>Datura stramonium</i>              | EY lab     | L-5701  |
| LTL      | <i>Lotus tetragonolobus</i>           | EY lab     | L-1601  |
| SSA      | <i>Sambucus sieboldiana</i>           | EY lab     | L-3501  |
| PWM, PWA | <i>Phytolacca americana</i>           | EY lab     | L-1901  |
| UDA      | <i>Urtica dioica</i>                  | EY lab     | L-8005  |
| ABA      | <i>Agaricus bisporus</i>              | EY lab     | L-5001  |
| WFA      | <i>Wisteria floribunda</i>            | EY lab     | L-3101  |

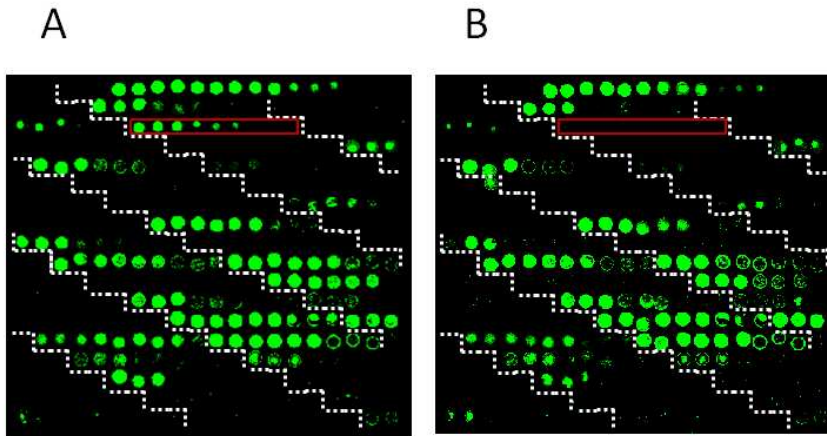

Supplementary Figure 1. Scan images of the TSA lectin microarray for LNCAP PSA (A) and LNCAP PSA treated with  $\alpha$ 1-2 fucosidase (B). The red box indicates the location of UEA I on the microarray.
